# Supplementary material
Source: publisher figshare collection journal article supplement (https://tandf.figshare.com/articles/dataset/_/11338730)
Supplement: Supplementary file 1 [file 2]

## **Supplementary Information**

**A New Chiral Boron–dipyrromethene (BODIPY)–based Fluorescent Probe:**

**Molecular docking, DFT, Antibacterial and Antioxidant approaches.**

**Rua B. Alnoman,<sup>a\*</sup> Shazia Parveen,<sup>a\*</sup> Mohamad Hagar,<sup>a,b</sup> Hoda A. Ahmed,<sup>a,c</sup> & Julian G. Knight<sup>d</sup>**

<sup>a</sup>*Faculty of Science, Chemistry Department, Taibah University, Yanbu Branch, 46423, Yanbu, Saudi Arabia.*

<sup>b</sup>*Faculty of Science, Chemistry Department, Alexandria University, Alexandria, Egypt.*

<sup>c</sup>*Faculty of Science, Department of Chemistry, Cairo University, Cairo, Egypt.*

<sup>d</sup>*School of Chemistry, Bedson Building, Newcastle University, Newcastle upon Tyne, NE1 7RU, UK.*

*\*Corresponding authors: email: rua-b-n@live.co.uk (R.B. Alnoman), shazia021@gmail.com (S. Parveen).*

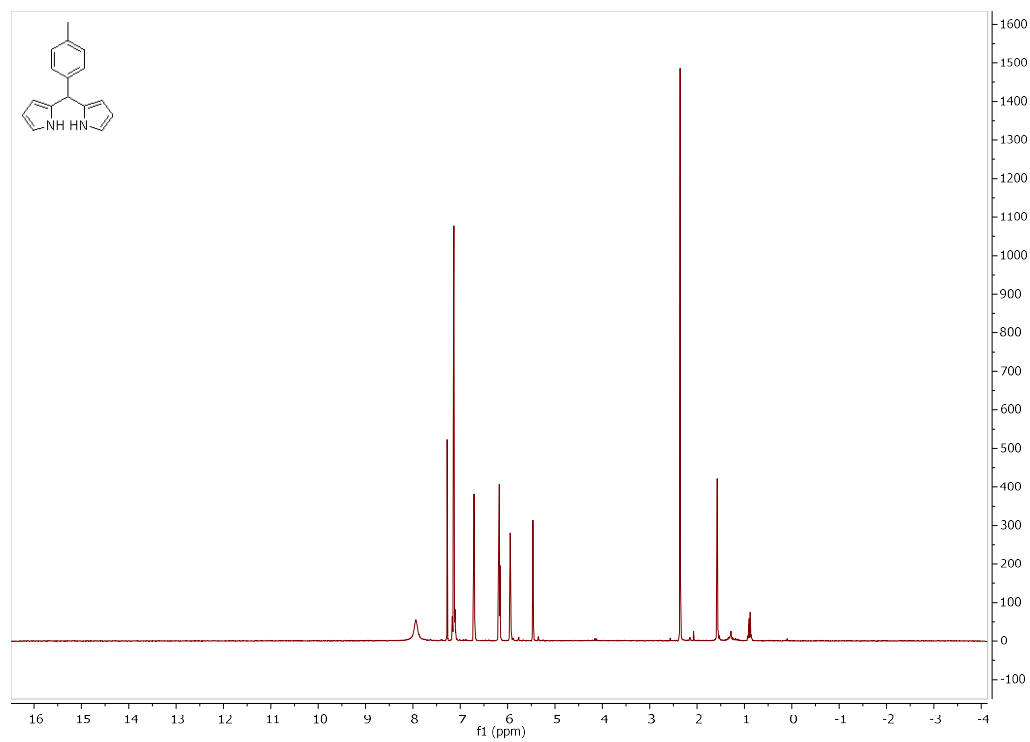

(a)

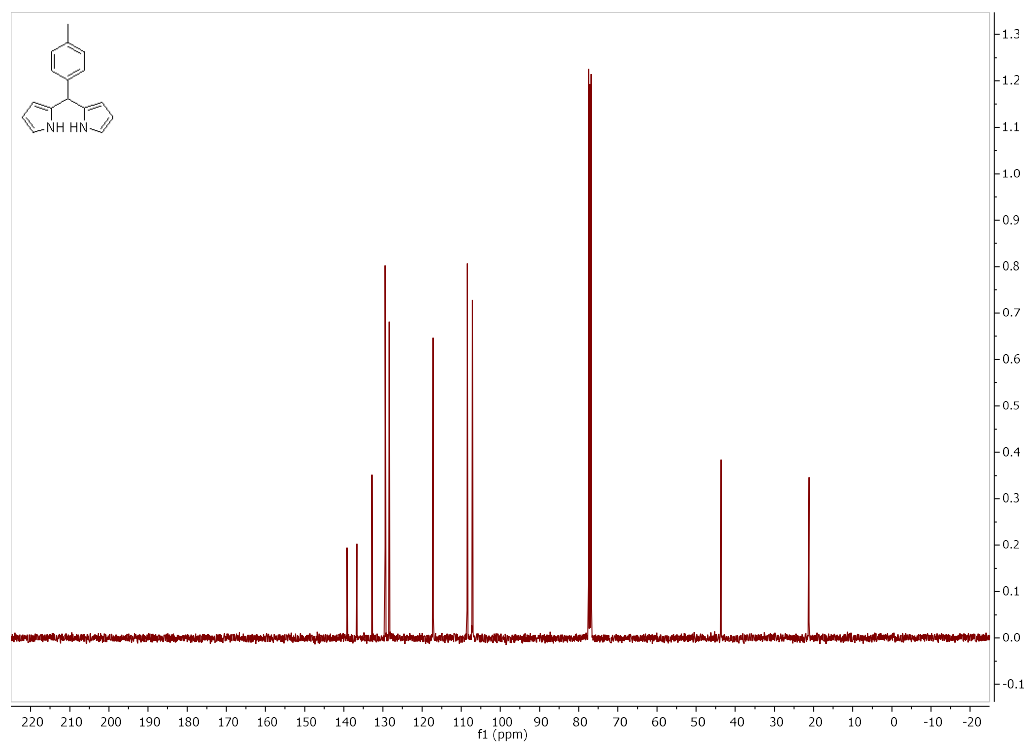

(b)

**Figure S1.** (a) <sup>1</sup>H NMR (300 MHz, CDCl<sub>3</sub>) and (b) <sup>13</sup>C NMR (101 MHz, CDCl<sub>3</sub>) spectra of compound **1**.

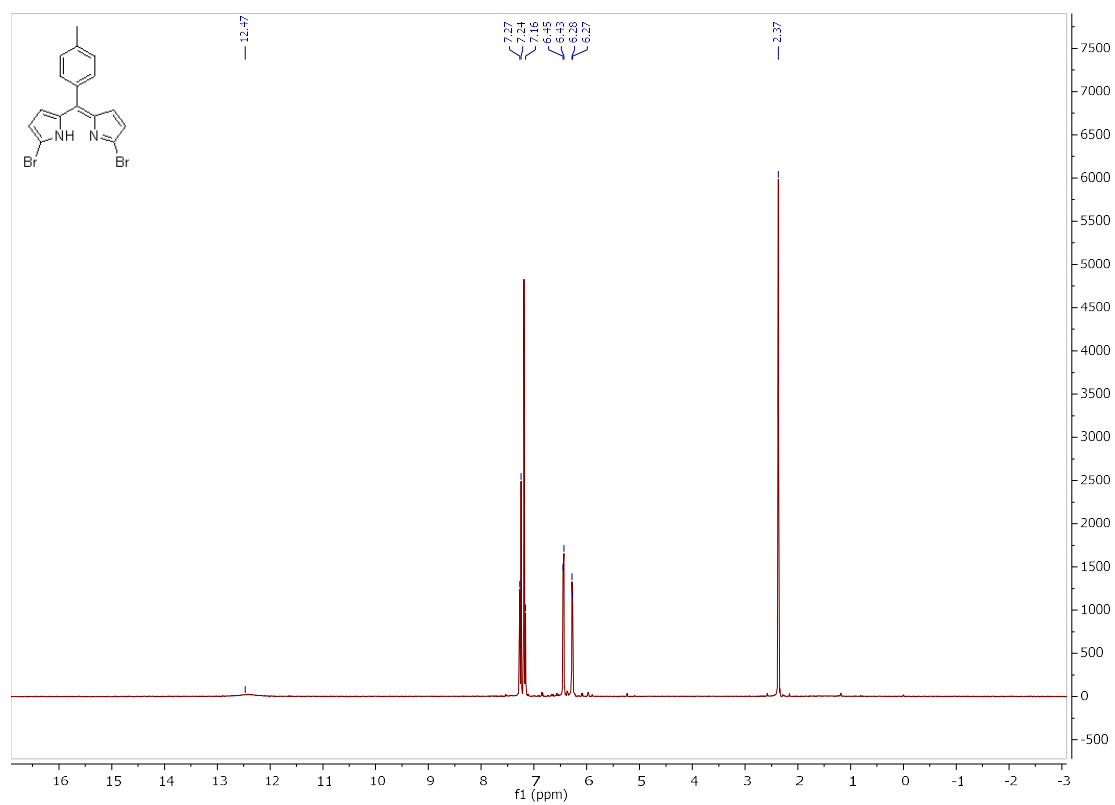

**Figure S2.** (a) <sup>1</sup>H NMR (300 MHz, CDCl<sub>3</sub>) spectra of compound **2**.

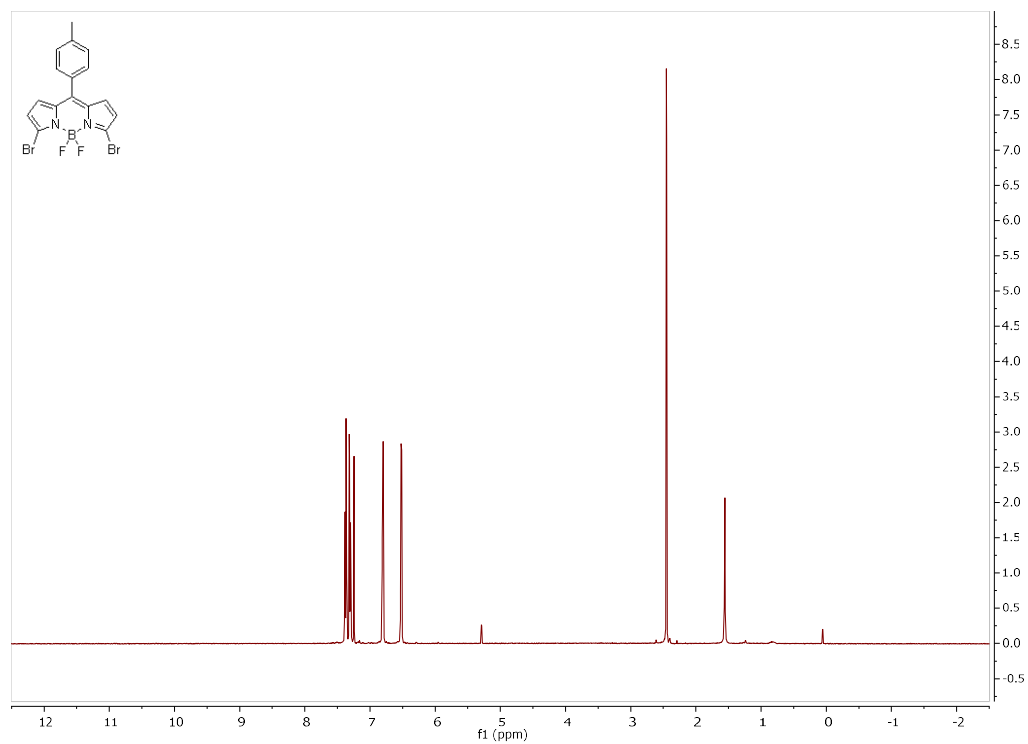

(a)

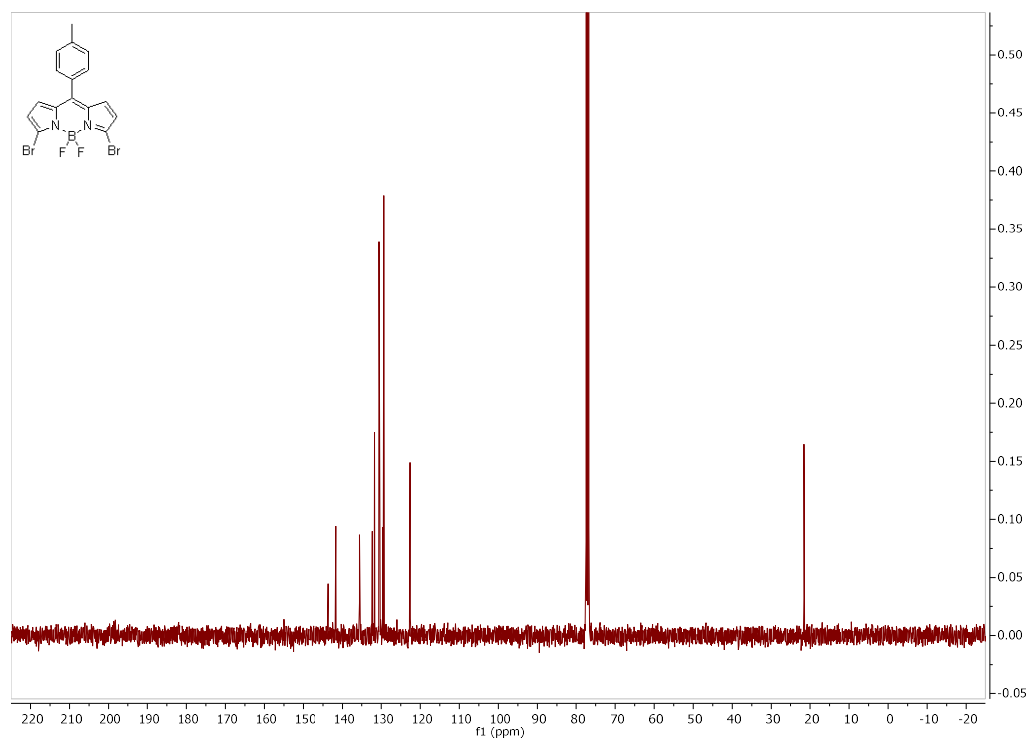

(b)

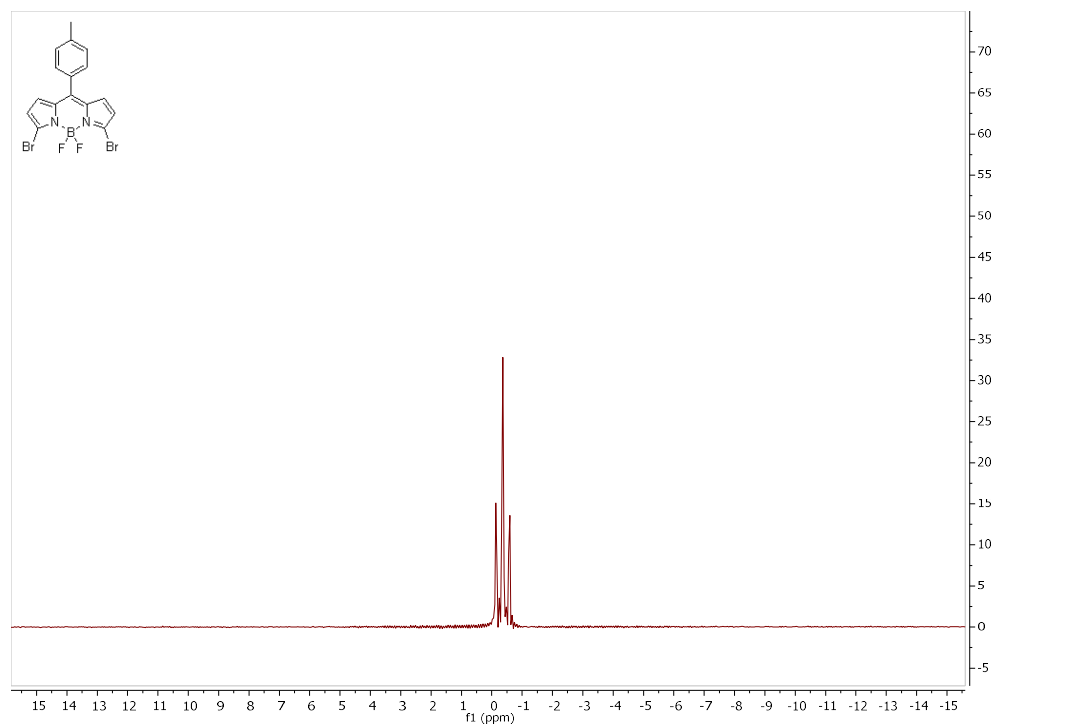

(c)

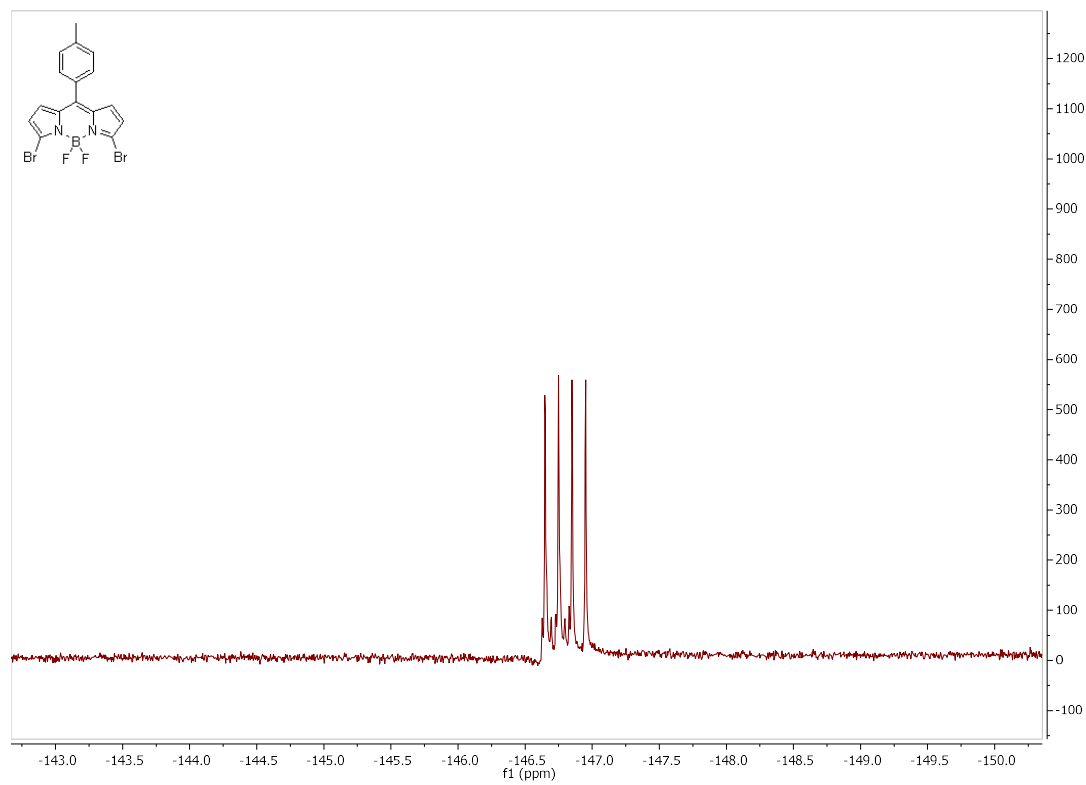

(d)

**Figure S3.** (a) <sup>1</sup>H NMR (300 MHz, CDCl<sub>3</sub>), (b) <sup>13</sup>C NMR (101 MHz, CDCl<sub>3</sub>), (c) <sup>11</sup>B NMR (128 MHz, CDCl<sub>3</sub>) and (d) <sup>19</sup>F NMR (282 MHz, CDCl<sub>3</sub>) spectra of compound **3**.

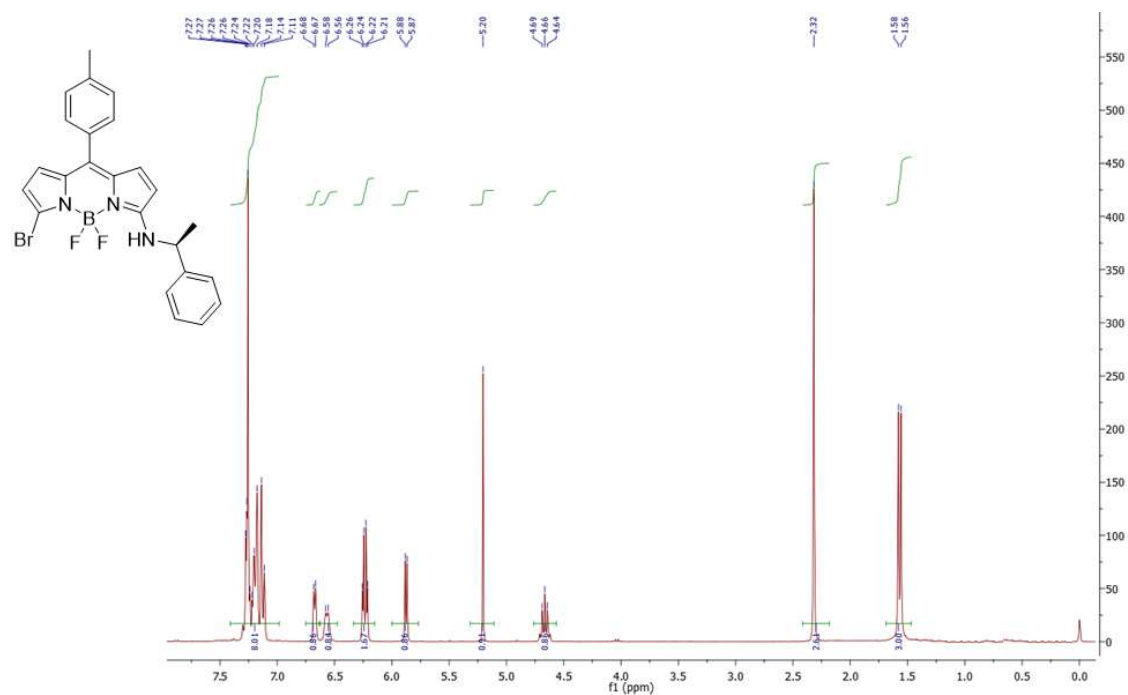

(a)

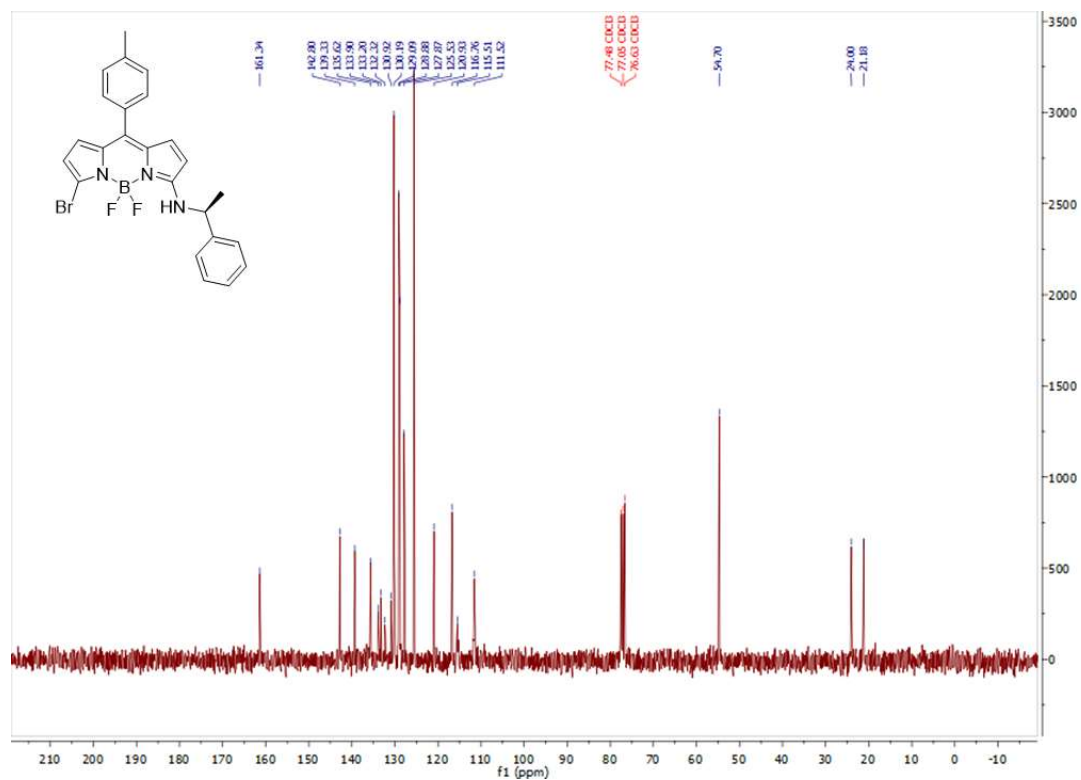

(b)

**Figure S4.** (a)  $^1\text{H}$  NMR (300 MHz,  $\text{CDCl}_3$ ) and (b)  $^{13}\text{C}$  NMR (101 MHz,  $\text{CDCl}_3$ ) spectra of compound **4**.
